# Supplementary material for: Comparison of DNA Extraction Methods for Microbial Community Profiling with an Application to Pediatric Bronchoalveolar Lavage Samples
Source: PubMed Central journal article supplement (PMC3326054; doi:10.1371/journal.pone.0034605), 2012-04-13

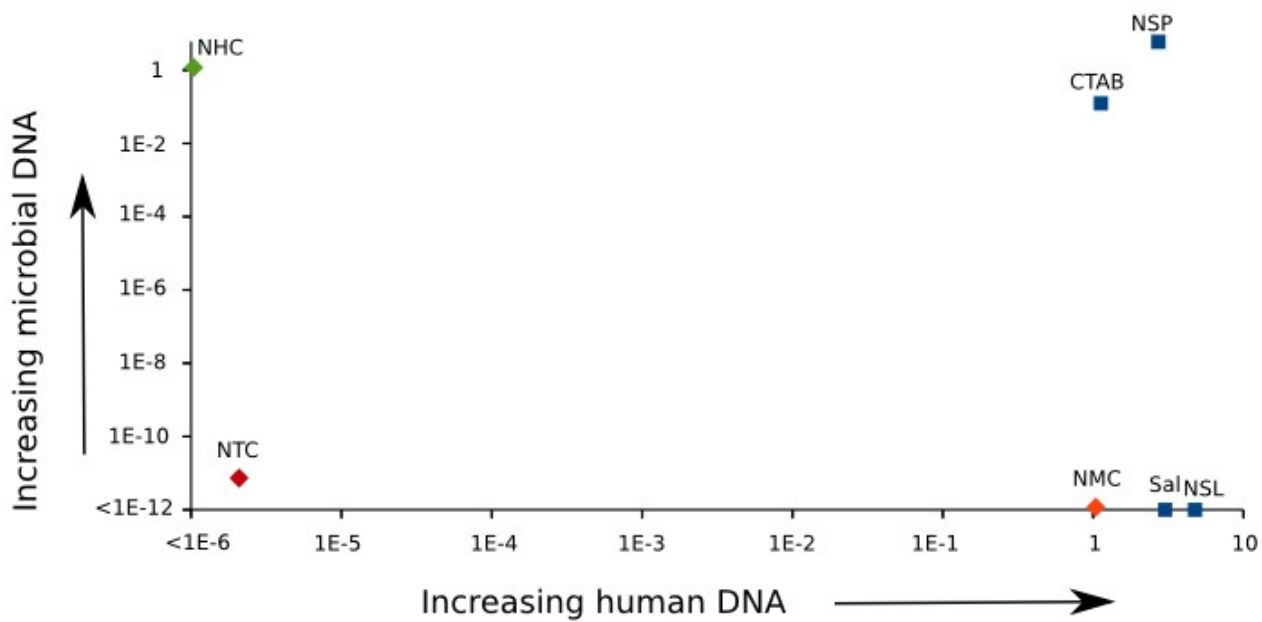

Supplement: pone.0034605.s002.pdf [file pone.0034605.s002.pdf]
